# Supplementary material for: Genome-Wide Profiling of p63 DNA–Binding Sites Identifies an Element that Regulates Gene Expression during Limb Development in the 7q21 SHFM1 Locus
Source: PubMed Central journal article supplement (PMC2924305; doi:10.1371/journal.pgen.1001065), 2010-08-19
Supplement: pgen.1001065.s003.pdf [file pgen.1001065.s003.pdf]

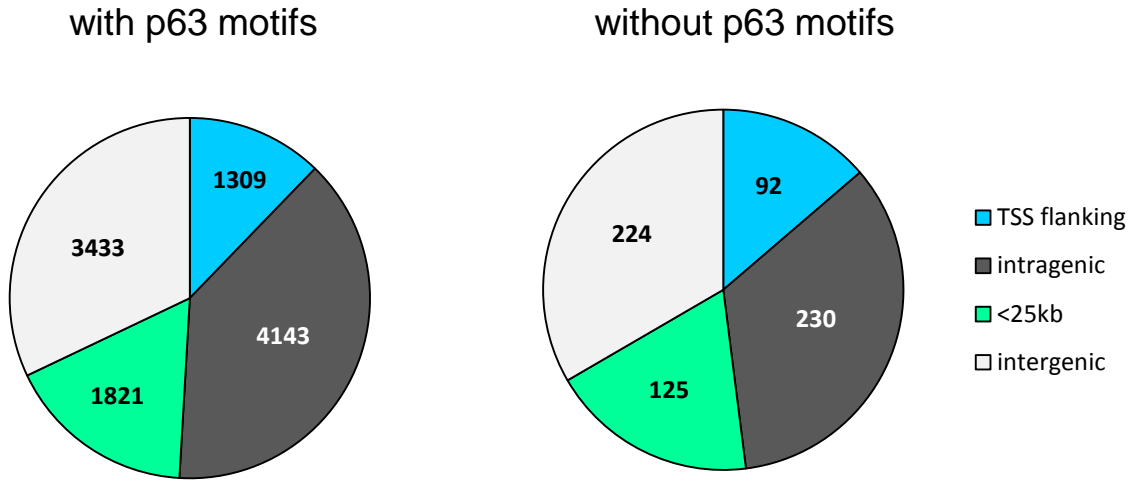

**Figure S3. Genomic distribution of p63 binding sites with and without p63 consensus binding motifs.**
