# Supplementary material for: Genome-Wide Profiling of p63 DNA–Binding Sites Identifies an Element that Regulates Gene Expression during Limb Development in the 7q21 SHFM1 Locus
Source: PLOS journal article supplement (doi:10.1371/journal.pgen.1001065), 2010-08-19
Supplement: S1 (10.1371/journal.pgen.1001065.s001) [file journal.pgen.1001065.s001]

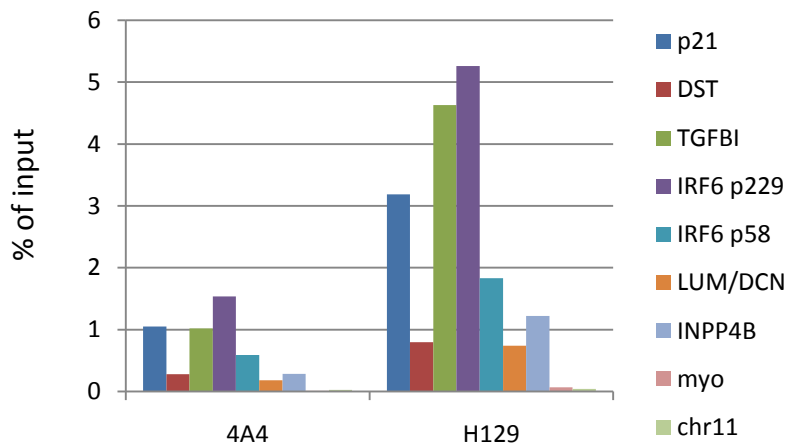

**Figure S1. ChIP-qPCR analysis of p63 binding in human primary keratinocytes using two different p63 antibodies 4A4 (pan-p63) and H129 ( $\alpha$ -specific).** Specific binding of p63 to the tested binding sites was observed, including to binding sites at p21<sup>WAF/CIP19</sup> and DST which served as positive controls, but not to the negative controls myoglobin exon 2 (myo) and a no-gene region (chr11).
